# Supplementary material for: Towards Universal Voluntary HIV Testing and Counselling: A Systematic Review and Meta-Analysis of Community-Based Approaches
Source: PLOS journal article supplement (doi:10.1371/journal.pmed.1001496), 2013-08-13
Supplement: S3 (10.1371/journal.pmed.1001496.s003) [file journal.pmed.1001496.s003]

|                                                             | <b>Selection bias</b>                                                                                                                        |                                                                                                             |                    | <b>Confounding</b>                                                                                                                                               | <b>Measurement bias</b>                                                                                                               |                                                                                              |                                                         |
|-------------------------------------------------------------|----------------------------------------------------------------------------------------------------------------------------------------------|-------------------------------------------------------------------------------------------------------------|--------------------|------------------------------------------------------------------------------------------------------------------------------------------------------------------|---------------------------------------------------------------------------------------------------------------------------------------|----------------------------------------------------------------------------------------------|---------------------------------------------------------|
| Author (Testing strategy, country)                          | Representativeness of the cohort in the community-based HTC arm the average person in the community from which study participants were drawn | Representativeness of the cohort in the facility-based HTC arm to the cohort in the community-based HTC arm | HTC use documented | Community-based and facility-based HTC arms are comparable with respect to a patient-level barrier (distance to testing site, income level, or education level)* | Cases confirmed through two tests in countries with HIV prevalence > 5% and through three tests in countries with HIV prevalence < 5% | Adequate follow-up to learn HIV status (one visit for rapid tests and two visits for others) | Test results available for > 70% of those accepting HTC |
| Ahmed (Mobile, Nigeria) [27]                                | 1                                                                                                                                            | 1                                                                                                           | 1                  | 0                                                                                                                                                                | 1                                                                                                                                     | 1                                                                                            | 1                                                       |
| Coates (Mobile, South Africa, Tanzania, and Zimbabwe) [130] | 1                                                                                                                                            | 1                                                                                                           | 1                  | NA                                                                                                                                                               | 1                                                                                                                                     | 1                                                                                            | 1                                                       |
| Corbett (Workplace, Zimbabwe) [22]                          | 0                                                                                                                                            | 1                                                                                                           | 1                  | NA                                                                                                                                                               | 1                                                                                                                                     | 1                                                                                            | 0                                                       |
| Gonzalez (Door-to-door, Mozambique) [62]                    | 1                                                                                                                                            | 0                                                                                                           | 1                  | 0                                                                                                                                                                | 1                                                                                                                                     | 1                                                                                            | 1                                                       |
| Grabbe (Mobile, Kenya) [107]                                | 0                                                                                                                                            | 1                                                                                                           | 1                  | 2                                                                                                                                                                | 1                                                                                                                                     | 1                                                                                            | 0                                                       |
| Granich (Mobile, Kenya) [125]                               | 0                                                                                                                                            | 0                                                                                                           | 1                  | 2                                                                                                                                                                | 1                                                                                                                                     | 1                                                                                            | 1                                                       |
| Hood (Mobile, Botswana) [119]                               | 1                                                                                                                                            | 0                                                                                                           | 1                  | 0                                                                                                                                                                | 1                                                                                                                                     | 1                                                                                            | 1                                                       |
| Lahuerta (Mobile, Guatemala) [108]                          | 1                                                                                                                                            | 0                                                                                                           | 1                  | 0                                                                                                                                                                | 1                                                                                                                                     | 1                                                                                            | 1                                                       |
| Lugada (Index, Uganda) [43]                                 | 1                                                                                                                                            | 1                                                                                                           | 1                  | 2                                                                                                                                                                | 1                                                                                                                                     | 1                                                                                            | 0                                                       |
| McCoy (Mobile, USA) [120]                                   | 0                                                                                                                                            | 1                                                                                                           | 1                  | NA                                                                                                                                                               | 1                                                                                                                                     | 1                                                                                            | 1                                                       |
| Menzies (Index, Uganda) [29]                                | 1                                                                                                                                            | 1                                                                                                           | 1                  | 2                                                                                                                                                                | 1                                                                                                                                     | 1                                                                                            | 1                                                       |
| Menzies (Door-to-door, Uganda) [29]                         | 1                                                                                                                                            | 1                                                                                                           | 1                  | 2                                                                                                                                                                | 1                                                                                                                                     | 1                                                                                            | 1                                                       |
| Spielberg (Mobile, USA) [111]                               | 0                                                                                                                                            | 0                                                                                                           | 1                  | 0                                                                                                                                                                | 1                                                                                                                                     | 1                                                                                            | 0                                                       |
| Sweat (Mobile, Tanzania) [23]                               | 1                                                                                                                                            | 1                                                                                                           | 1                  | NA                                                                                                                                                               | 1                                                                                                                                     | 1                                                                                            | 1                                                       |
| Sweat (Mobile, Zimbabwe) [23]                               | 1                                                                                                                                            | 1                                                                                                           | 1                  | NA                                                                                                                                                               | 1                                                                                                                                     | 1                                                                                            | 1                                                       |
| Sweat (Mobile, Thailand) [23]                               | 0                                                                                                                                            | 1                                                                                                           | 1                  | NA                                                                                                                                                               | 1                                                                                                                                     | 1                                                                                            | 1                                                       |
| van Schaik (Mobile, South Africa) [121]                     | 1                                                                                                                                            | 0                                                                                                           | 1                  | 2                                                                                                                                                                | 0                                                                                                                                     | 1                                                                                            | 1                                                       |
| Wachira (Door-to-door, Kenya) [127]                         | 0                                                                                                                                            | 1                                                                                                           | 1                  | 2                                                                                                                                                                | 0                                                                                                                                     | 0                                                                                            | 0                                                       |
| Wolff (Door-to-door, Uganda) [81]                           | 0                                                                                                                                            | 0                                                                                                           | 1                  | 2                                                                                                                                                                | 1                                                                                                                                     | 1                                                                                            | 0                                                       |
