# Supplementary material for: Towards Universal Voluntary HIV Testing and Counselling: A Systematic Review and Meta-Analysis of Community-Based Approaches
Source: PLoS Med. 2013 Aug 13;10(8):e1001496. doi: 10.1371/journal.pmed.1001496 (PMC3742447; doi:10.1371/journal.pmed.1001496)
Supplement: Table S3 — Bias assessment for randomised controlled trials. (PDF) [file pmed.1001496.s004.pdf]

| Author (Testing strategy, country)                                                                                            | Adequate<br>sequence<br>generation<br>(selection<br>bias) | Allocation<br>concealment<br>(selection<br>bias) | Blinding of<br>participants,<br>personnel, and<br>outcome assessors<br>(performance and<br>detection bias) | Incomplete<br>outcome<br>data<br>addressed<br>(attrition<br>bias) | Free of<br>selective<br>reporting<br>(reporting<br>bias) | Free<br>of<br>other<br>bias |
|-------------------------------------------------------------------------------------------------------------------------------|-----------------------------------------------------------|--------------------------------------------------|------------------------------------------------------------------------------------------------------------|-------------------------------------------------------------------|----------------------------------------------------------|-----------------------------|
| Corbett (Workplace, Zimbabwe) [ <a href="#">22</a> ]                                                                          | 1                                                         | 1                                                | 0                                                                                                          | 1                                                                 | 1                                                        | 1                           |
| Coates and Sweat (Mobile, Tanzania,<br>Zimbabwe, South Africa, and Thailand )<br>[ <a href="#">23</a> , <a href="#">130</a> ] | 1                                                         | 1                                                | 0                                                                                                          | 1                                                                 | 1                                                        | 1                           |
